# Supplementary material for: Nanocrystalline Apatites: Post-Immersion Acidification and How to Avoid It—Application to Antibacterial Bone Substitutes
Source: MDPI journal article supplement (doi:10.3390/bioengineering10020220), 2023-02-07
Supplement: s1 [file s1]

# “Nanocrystalline apatites: post-immersion acidification and how to avoid it. Application to antibacterial bone substitutes”

Drouet *et al.*

## Supplementary Information

**Figure S1.** pH evolution over time at RT of deionized water, with re-immersed hap-1d or hap-20min apatite compounds.

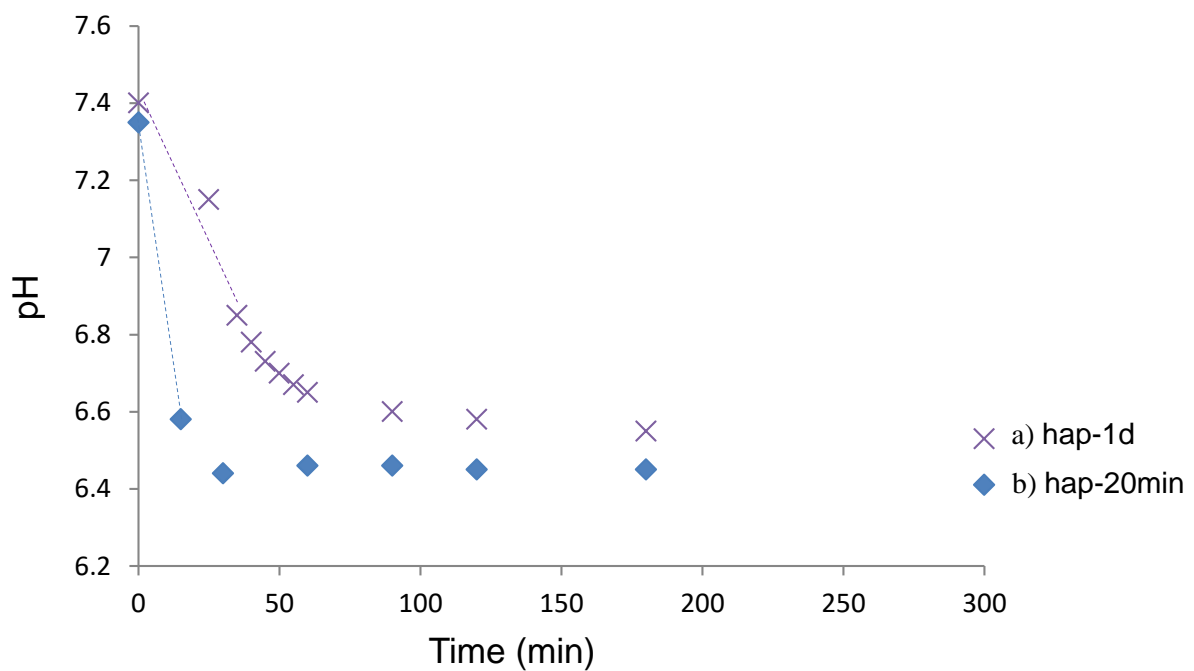

**Figure S2.** pH evolution over time at RT of deionized water, with re-immersed stoichiometric HA (a)  $\text{Ca}_{10}(\text{PO}_4)_6(\text{OH})_2$  or apatitic TCP (b)  $(\text{Ca}_9(\text{PO}_4)_5(\text{HPO}_4)(\text{OH}))$  (with only apatitic  $\text{HPO}_4^{2-}$  ions). As expected in these cases, no pH drop was observed in contrast to nanocrystalline apatites.

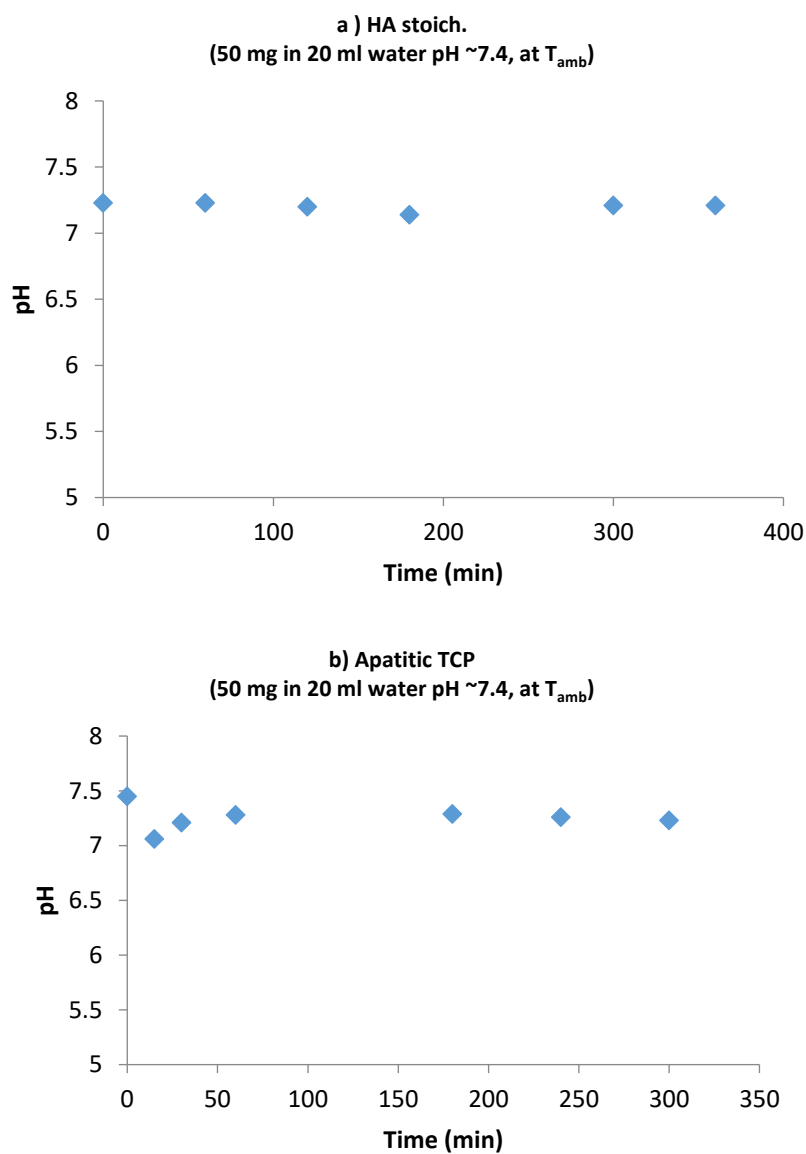

**Figure S3.** Cytotoxicity evaluation (CAL-72 human osteoblast cells) of non pre-equilibrated hap-1d reference sample (non doped) in our working conditions relative to the controls. Neutral Red test.  $t = 24$  h

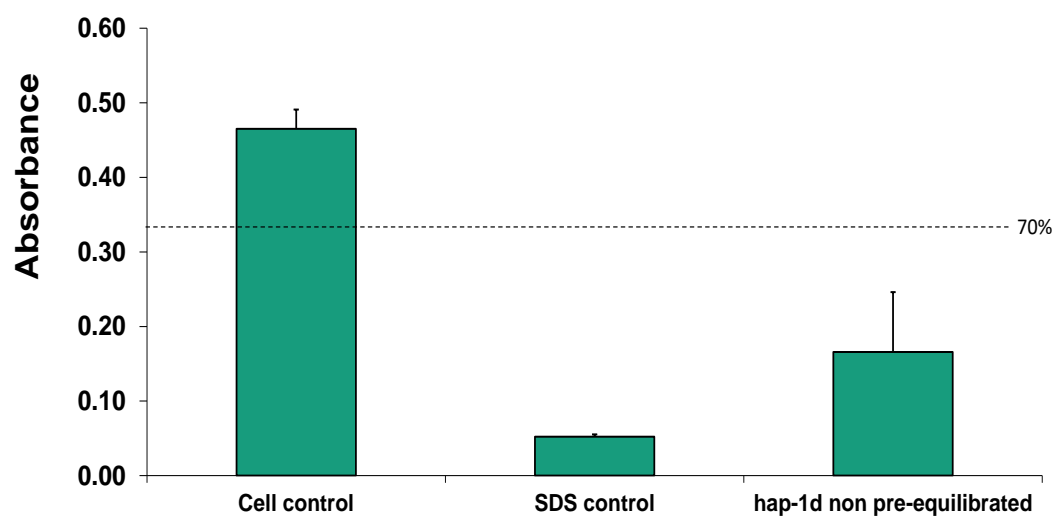

**Figure S4.** Main physicochemical features (through XRD, FTIR and atomic absorption spectroscopy) of  $\text{Cu}^{2+}$ - and  $\text{Ag}^+$ -doped apatite samples

### XRD

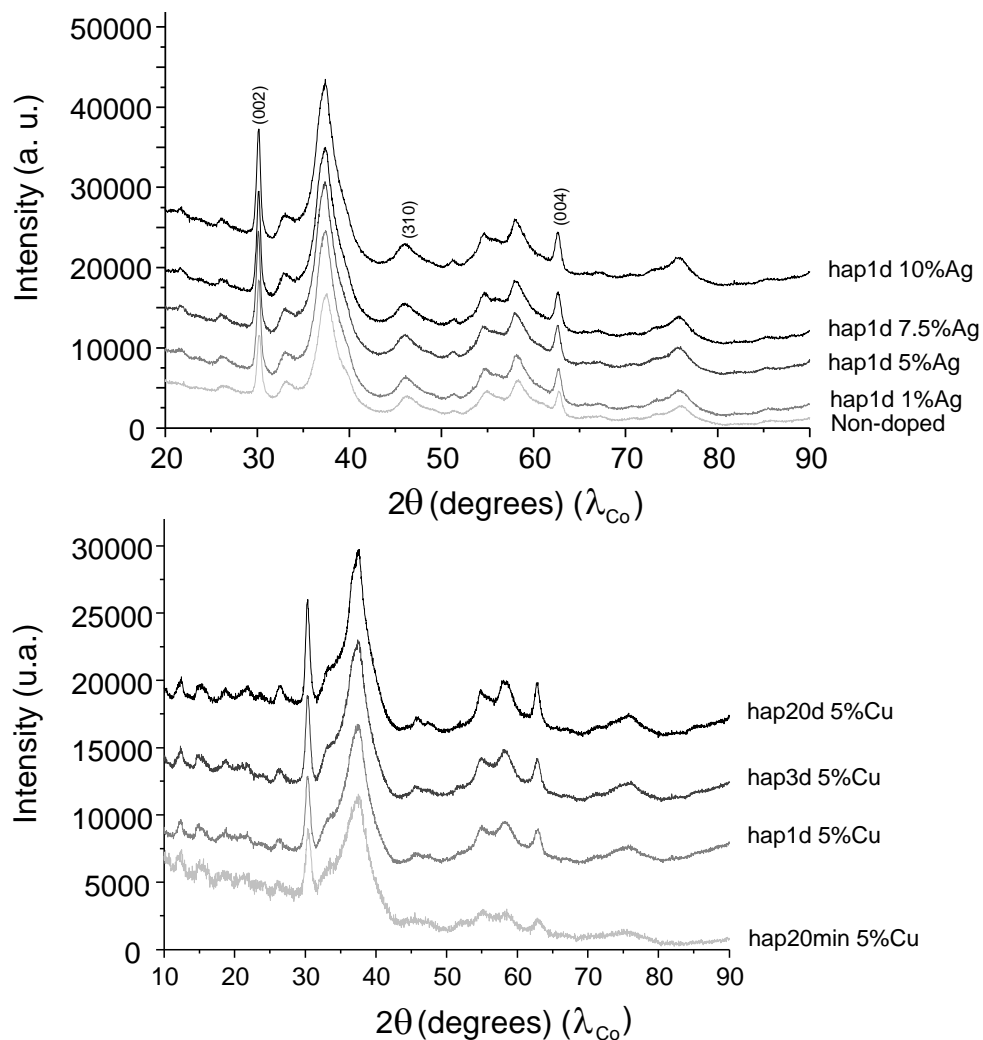

### Atomic absorption spectroscopy

| Sample       | Initial Ag mol.% in solution | Final Ag mol.% in solid | (Ca+Ag)/P       |
|--------------|------------------------------|-------------------------|-----------------|
| hap1d        | 0                            | 0                       | $1.46 \pm 0.02$ |
| hap1d 1%Ag   | 1.0                          | 1.1                     | $1.49 \pm 0.02$ |
| hap1d 5%Ag   | 5.0                          | 3.4                     | $1.50 \pm 0.02$ |
| hap1d 7.5%Ag | 7.5                          | 4.00                    | $1.51 \pm 0.02$ |

| Sample      | Initial Cu mol.% in solution | Final Cu mol.% in solid | (Ca+Cu+Na)/P    |
|-------------|------------------------------|-------------------------|-----------------|
| hap3d       | 0                            | 0                       | $1.46 \pm 0.02$ |
| hap3d 1%Cu  | 1.0                          | 0.9                     | $1.41 \pm 0.02$ |
| hap3d 5%Cu  | 5.0                          | 4.7                     | $1.44 \pm 0.02$ |
| hap3d 10%Cu | 10.0                         | 9.6                     | $1.48 \pm 0.02$ |

Figure S4 (continued)

**FTIR**

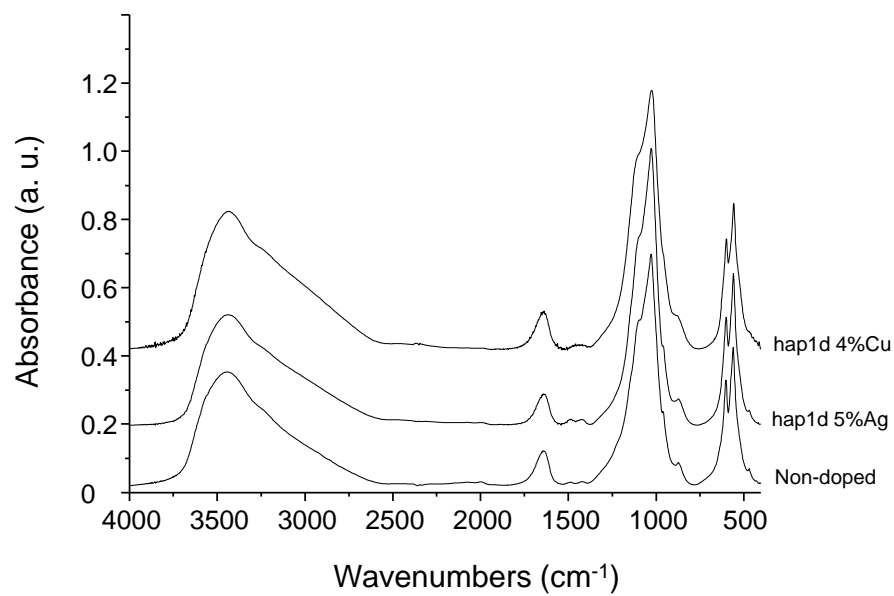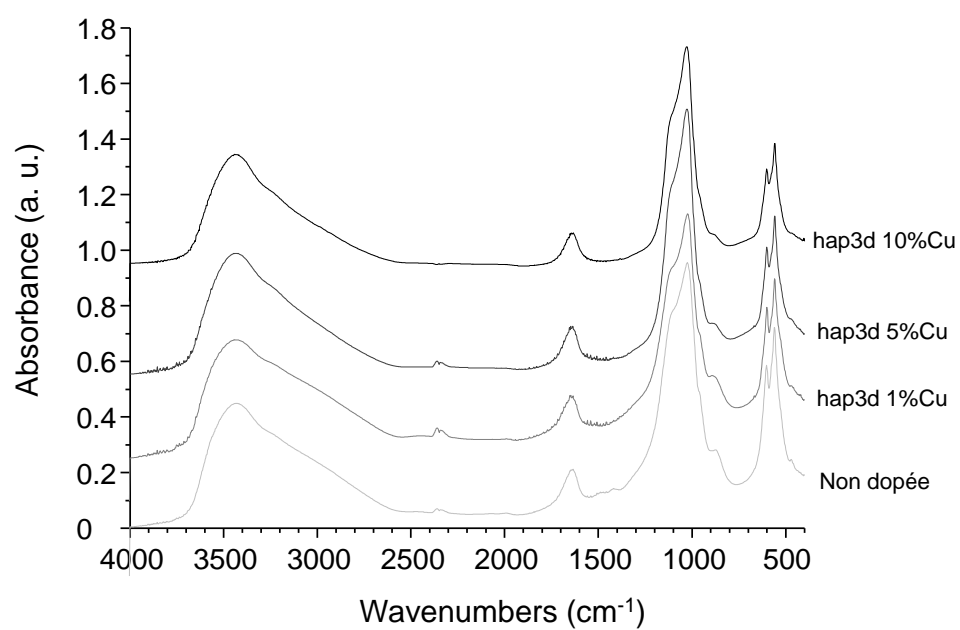

**Figure S5:** Cytotoxicity evaluation (CAL-72 human osteoblast cells) of pre-equilibrated hap-1d samples doped with either  $\text{Cu}^{2+}$  (a) or  $\text{Ag}^+$  (b) ions in a wide range of doping rates (substitution of calcium in the apatite precipitation medium with the indicated percentage), in our working conditions, relative to the controls. Neutral Red tests.

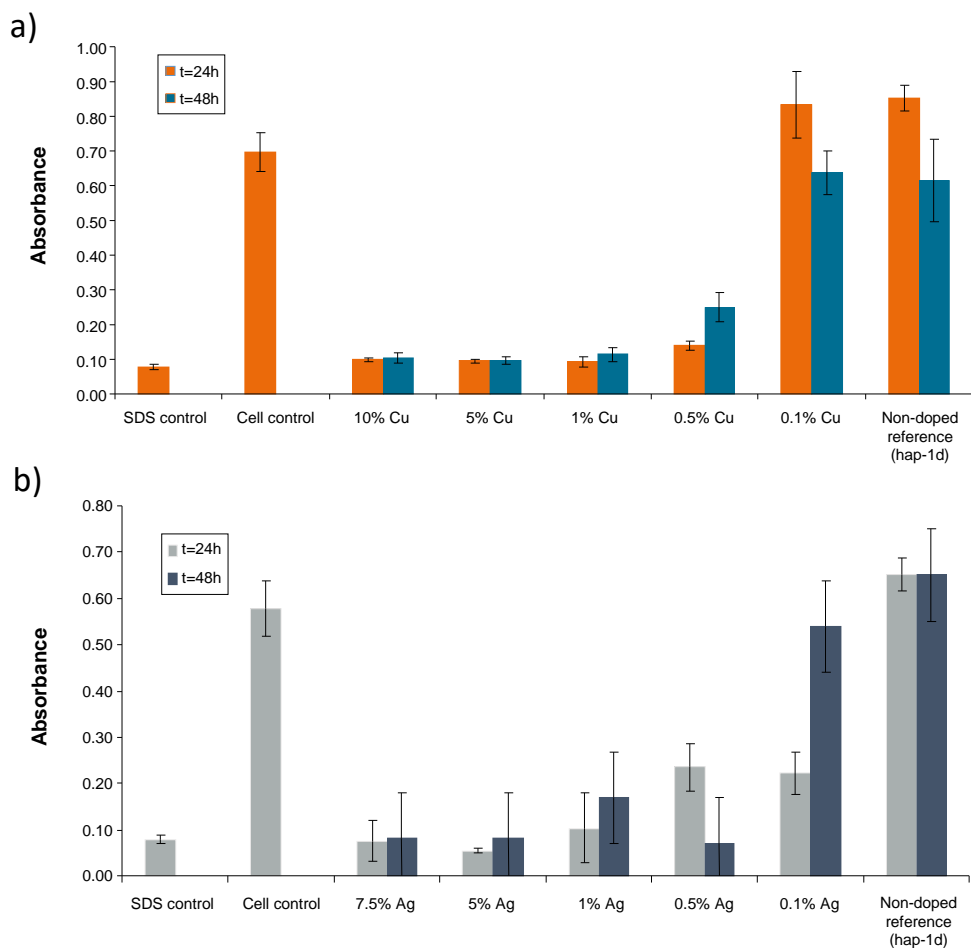

**Table S1.** ICP-OES measurements of the Ca and P released contents in solution upon re-immersion of hap20min, hap3h and hap1d samples (water, initial pH 7.4). The Ca and P calibration lines led respectively to correlation coefficients  $R^2$  of coefficient de correlation 0.9998 and 0.9999. The mean relative error on each measurement is estimated to 2%.

| Sample<br>(50 mg in 20 ml) | Ca<br>(ppm) | P<br>(ppm) | molar Ca/P<br>in solution |
|----------------------------|-------------|------------|---------------------------|
| hap20min                   | 23.87       | 39.73      | 0.47                      |
| hap3h                      | 30.61       | 42.61      | 0.56                      |
| hap1d                      | 18.50       | 32.38      | 0.44                      |
